# Supplementary material for: Helicobacter pylori eradication and gastric cancer prevention: Pooled analysis of large-scale cohort studies in Japan
Source: Research Square preprint supplement (doi:10.21203/rs.3.rs-5036019/v1), 2024-11-25
Supplement: Supplementary file 1 [file 3940b884814d347e45097d54.docx]

**Table S1.** Baseline characteristics by combined results of the anti-*H. pylori* IgG antibody and serum pepsinogen (PG) 1 and PG2 assays

|  | **No history of *H. pylori* eradication　 (at baseline survey)** | | | | **Self-reported history of**  ***H. pylori***  **eradication  (at baseline survey)** |  |
| --- | --- | --- | --- | --- | --- | --- |
| **(n = 48530)** | ***H. pylori-*negative and AG-negative** | ***H. pylori*-positive and AG-negative** | ***H. pylori*-positive and AG-positive** | ***H. pylori-*negative and AG-positive** | **P-**  **value** |
| **n=20,488** | **n=9,825** | **n=10,941** | **n=1,598** | **n=5,678** |  |
| **Age (mean, SD)** | 57.7 (9.8) | 60.4 (8.7) | 63.5 (7.5) | 65.1 (7.2) | 61.8 (8.0) | <0.01 |
| **Sex** |  |  |  |  |  |  |
| male (%) | 8,182 (39.9%) | 4,193 (42.7%) | 4,607 (42.1%) | 780 (48.8%) | 3,000 (52.8%) | <0.01 |
| **Gastric cancer (n, %)** | 55 (0.3%) | 112 (1.1%) | 323 (3.0%) | 63 (3.9%) | 96 (1.7%) | <0.01 |
| **Study area (n, %)** |  |  |  |  |  | <0.01 |
| Yamagata | 2,928 | 2,276 | 3,702 | 692 | 1,161 (10.8%)* |  |
| Yokote | 6,171 | 3,477 | 3,491 | 446 | 1,928 (15.7%)* |  |
| Saku | 6,769 | 2,228 | 1,933 | 223 | 1,132 (7.3%)* |  |
| Chikusei | 4,622 | 1,844 | 1,813 | 238 | 1,161 (20.4%)* |  |
| **Alcohol (n, %)** |  |  |  |  | 1,928 (33.9%)* | <0.01 |
| never of rarely | 9,510 (46.4%) | 4,517 (46.0%) | 5,401 (49.4%) | 784 (49.0%) | 1,132 (19.9%)* |  |
| <150 g/week | 5,186 (25.3%) | 2,196 (22.4%) | 1,884 (17.2%) | 243 (15.2%) | 1,458 (25.7%)* |  |
| 150-300 g/week | 1,953 (9.5%) | 971 (9.9%) | 982 (9.0%) | 116 (7.3%) | 637 (11.2%) |  |
| >300 g/week | 2,558 (12.5%) | 1,240 (12.6%) | 1,251 (11.4%) | 185 (11.6%) | 858 (15.1%) |  |
| missing | 1,281 (6.3%) | 901 (9.2%) | 1,421 (13.0%) | 271 (16.9%) | 502 (8.8%) |  |
| **Smoking (n, %)** |  |  |  |  |  | <0.01 |
| never and former | 16,989 (82.9%) | 8,309 (84.6%) | 9,457 (86.5%) | 1,332 (83.4%) | 4,612 (81.2%) |  |
| current smoker | 3,148 (15.4%) | 1,360 (13.8%) | 1,255 (11.5%) | 231 (14.4%) | 992 (17.5%) |  |
| missing | 352 (1.7%) | 156 (1.6%) | 227 (2.1%) | 35 (2.2%) | 74 (1.3%) |  |
| **Baseline survey year (n, %)** |  |  |  |  |  | <0.01 |
| before 2012 | 12,103 | 5,939 | 7,454 | 1,107 | 2,732 (9.3%)** |  |
| since 2013 | 8,353 | 3,886 | 3,483 | 491 | 2,946 (15.4%)** |  |

*H. pylori*, *Helicobacter pylori*;AG, atrophic gastritis

*Proportion of participants with a history of *H. pylori* eradication among study area's target population
**Proportion of participants with a history of *H. pylori* eradication by year group of participation
